# ***Ex vivo* delivery of regulatory T cells for control of alloimmune priming in the donor lung**

**Authors:** Ei Miyamoto, Akihiro Takahagi, Akihiro Ohsumi, Tereza Martinu, David Hwang, Kristen M. Boonstra, Betty Joe, Juan Mauricio Umana, Ke F. Bei, Daniel Vosoughi, Mingyao Liu, Marcelo Cypel, Shaf Keshavjee, Stephen C. Juvet\*

## **Affiliations:**

Latner Thoracic Surgery Research Laboratories, University Health Network, University of Toronto, Toronto, Ontario, Canada.

## **\*Corresponding author**

Address: 585 University Avenue, Room 11 PMB 126, Toronto ON Canada M5G 2N2

Tell#: 416-340-4800 (x8178)

Fax#: 416-946-4532

[Stephen.Juvet@uhn.ca](mailto:Stephen.Juvet@uhn.ca)

**Author contributions:** S.J. conceived and designed the project. S.J., E.M., A.T., M.C., T.M., M.L., and S.K. contributed to the interpretation of data and critically revised the manuscript. E.M. and A.O. developed the method of rat Treg injection. E.M. and A.T. performed rat EVLP and transplantation. E.M., K.M.B., M.U. and B.J. isolated and expanded Tregs and performed suppression assays and flow cytometry. D.H. and T.M. performed histologic grading of ALI in the lung graft. E.M., K.F.B., D.V., and Z.G. performed immunohistochemistry and immunofluorescence staining and analysis. Z.G. performed gene expression analysis. E.M. and S.J. contributed to the statistical analysis.

**All sources of support:** This work was supported by an Ontario Institute for Regenerative Medicine – Medicine by Design New Ideas Grant (#NI17-107) and the Cystic Fibrosis Canada Marsha Morton New Investigator Award (#559984) (both to SJ). E.M. was supported by Research fellowships from The Cell Science Research Foundation (Japan, 2016), The Kyoto University Foundation (Japan, 2016), and the International Society for Heart and Lung Transplantation (2018). M.C. and S.K. are co-founders of Perfusix Canada, XOR Labs Toronto, and consultants for Lung Bioengineering, United Therapeutics. All other authors declare no competing interests.

**Short title:** *Ex vivo* Treg cell therapy of the donor lung

The success of lung transplantation is limited by inflammatory processes that begin at the time of transplantation. We developed a personalized, recipient-derived lung allograft directed regulatory T cell therapy administered prior to transplantation. Our results show the feasibility of this approach in rat and human lungs and provide evidence of immune regulation post-transplant.

**Subject category list:** 16.2 Transplantation

**Total word count:** 3456

This article has an online data supplement, which is accessible from this issue's table of content online at [www.atsjournals.org](http://www.atsjournals.org).

# **Abstract:**

## **Rationale**

Survival after lung transplantation (LTx) is hampered by uncontrolled inflammation and alloimmunity. Regulatory T cells (Tregs) are being studied for post-implantation cell therapy in solid organ transplantation. Whether these systemically administered Tregs can function at the appropriate location and time is an important concern.

## **Objectives**

We hypothesized that *in vitro* expanded, recipient-derived Tregs can be delivered to donor lungs prior to LTx via *ex vivo* lung perfusion (EVLP), maintaining their immunomodulatory ability.

## **Methods**

In a rat model, Wistar Kyoto (WKy) CD4<sup>+</sup>CD25<sup>high</sup> Tregs were expanded *in vitro* prior to EVLP. Expanded Tregs were administered to Fisher 344 (F344) donor lungs during EVLP; left lungs were transplanted into WKy recipients. Treg localization and function post-transplant were assessed. In a proof-of-concept experiment, cryopreserved expanded human CD4<sup>+</sup>CD25<sup>+</sup>CD127<sup>low</sup> Tregs were thawed and injected into discarded human lungs during EVLP.

## **Measurements and Main Results**

Rat Tregs entered the lung parenchyma and retained suppressive function. Expanded Tregs had no adverse effect on donor lung physiology during EVLP; lung water as measured by wet-to-dry weight ratio was reduced by Treg therapy. The administered cells remained in the graft at 3 days post-transplant where they reduced activation of intra-graft effector CD4<sup>+</sup> T cells; these effects were diminished by day 7. Human Tregs entered the lung parenchyma during EVLP where they expressed key immunoregulatory molecules (CTLA4<sup>+</sup>, 4-1BB<sup>+</sup>, CD39<sup>+</sup>, and CD15s<sup>+</sup>).

## **Conclusions**

Pre-transplant Treg administration can inhibit alloimmunity within the lung allograft at early time points post-transplant. Our organ-directed approach has potential for clinical translation.

# Introduction

Lung transplantation (LTx) is a life-saving treatment option for end-stage lung disease, but survival after LTx remains poor because of chronic lung allograft dysfunction, which is driven primarily by the recipient's alloimmune response. CD4<sup>+</sup>CD25<sup>hi</sup>Foxp3<sup>+</sup> regulatory T cells (Tregs) can inhibit allograft rejection by secreting inhibitory cytokines or modulating dendritic cells (DCs) via costimulatory pathways, and are currently being studied as a post-implantation adoptive cellular therapy in clinical trials of kidney and liver transplantation (1). Although secondary lymphoid organs are an important site of immune regulation by Tregs, it has been known for many years that the presence of a high Treg-to-conventional T cell (Tconv) ratio within allografts is required for allograft acceptance (2, 3). Moreover, animal data indicate that lung allografts can be rejected in the absence of secondary lymphoid organs – and that the initial priming of alloreactive T cells occurs within the lung allograft itself (4, 5). These observations raise the concern that post-transplant systemic Treg administration in LTx recipients may be limited in its ability to provide adequate and timely immune regulation at the relevant sites in time to inhibit rejection.

We have developed and translated to the bedside, a technique of extended *ex vivo* lung perfusion (EVLP) as a platform for donor lung assessment and treatment (6). We have also demonstrated successful delivery of gene and cellular therapy in animal and human lungs (7, 8). Pre-transplant administration of recipient-derived Tregs directly into the donor lungs affords the unique opportunity to seed the lung allograft with a therapeutic immune regulatory cell population in advance of the arrival of alloreactive T cells after graft implantation. Since Tregs can be expanded, cryopreserved and then thawed at a later date while retaining suppressive function (9), this could be a potentially viable approach for clinical application in LTx from deceased donors.

In the current study, we tested the hypothesis that *in vitro* expanded recipient Tregs administered to the donor lung allograft during EVLP prior to transplantation creates an immunoregulatory environment in the donor lung leading to a diminished immune response within the lung allograft post-implantation. We used a rat EVLP-to-LTx experimental model to examine how Tregs interact with the lungs and how they may inhibit immune responses in the recipients. In a proof-of-concept experiment, we then showed that cryopreserved expanded human Tregs can be delivered successfully to human lungs on EVLP.

# Materials and Methods

## *Expanded rat Treg injection during rat EVLP followed by LTx*

To study EVLP-based Treg therapy, we opted for a rat model which is amenable to EVLP followed by single LTx, based on our and others' experience (10, 11). We used a Fisher 344 (F344, RT1<sup>lv</sup>)-to-Wistar Kyoto (WKy, RT1<sup>l</sup>) strain combination (12). WKy rats were used as recipients and F344 rats as allogeneic lung donors. Our protocol is depicted in Figure 1A. WKy CD4<sup>+</sup>CD25<sup>high</sup> cells were isolated by magnetic and fluorescence-activated cell sorting and expanded with anti-CD3 and anti-CD28 coated beads (Miltenyi Biotec) and 1000 units/mL recombinant human IL-2 (rhIL-2, Chiron) for 7 days. Expanded Tregs were labelled with CMTMR and/or eF450 cell tracker dye and resuspended in 1 mL perfusate solution (Steen®, XVIVO Perfusion, Denver, CO). Normothermic acellular EVLP was performed as previously reported (10). A total of 4.3~211.3 × 10<sup>6</sup> live Tregs/kg F344 donor body weight were injected

into the EVLP circuit upstream of the lungs at 60 min of EVLP. In control experiments, grafts received 1 mL Steen containing no cells. Perfusate was sampled upstream and downstream of the lung. At 180 min after injection, the right lung was used for analyses end-EVLP analysis and the left lung was transplanted into a WKy recipient. Recipients were euthanized at days 3 or 7 post-transplant. The animal study was performed in accordance with the policies formulated by the Canadian Council on Animal Care and the protocol was approved by the Institutional Animal Care Committee (AUP2853).

### *Expanded human Treg injection during human EVLP*

The protocol for the human experiment is shown in Figure 1B.  $CD4^+CD25^+CD127^{low}$  cells were isolated from a healthy donor and expanded for 21 days using anti-CD3 and anti-CD28-coated beads (Miltenyi Biotec) and 300 units/mL rhIL-2 (Chiron). At day 21, Tregs were cryopreserved. Human donor lungs on normothermic acellular EVLP that were deemed unsuitable for transplantation due to alveolar edema and/or poor compliance were used for the study ( $n = 3$ ). Left or right single lung EVLP was established by truncating or clamping the hilum of the worse lung. Cryopreserved human Tregs were thawed and labelled with CMTMR and eF450 cell tracker dye. A total of  $0.4\sim0.8 \times 10^9$  Tregs were resuspended in 20 mL Steen and injected into the EVLP circuit upstream of the lung. Perfusate and lung tissue were sampled just before Treg injection and at 60 min and 120 min after injection. Tissue samples taken at similar time points from contemporaneous declined lungs undergoing EVLP (no Treg injection,  $n = 5$ ) were also obtained as controls. Experiments on human lungs were performed in accordance with the Helsinki declaration and was approved by the Institutional Research Ethics Board (06-283).

## **Results**

### *Characteristics of isolated and expanded rat Tregs*

Few studies have isolated and expanded rat Treg cells, and few antibodies are available for distinguishing regulatory and non-regulatory  $CD4^+CD25^+$  T cells in rats (13). We sorted WKy  $CD4^+CD25^{high}$  cells (highest 2% of  $CD25^+ CD4^+$  T cells, Figure E1A) and found that they were  $73.4 \pm 12.8\%$  Foxp3<sup>+</sup>. Expansion with anti-CD3 and anti-CD28-coated beads and IL-2 resulted in  $152.8 \pm 17.1$ -fold expansion (Figure 2A,  $n = 21$ ), with largely retained Foxp3 expression ( $63.5 \pm 8.3\%$  FoxP3<sup>+</sup>, Figure E1B) and CD25 expression ( $93.6 \pm 1.5\%$   $CD25^+$ ) at day 7. They also upregulated CD8 ( $81.3 \pm 2.4\%$   $CD8^+$ ) at day 7, as reported previously (14). The expanded cells dose-dependently suppressed *in vitro* proliferation of polyclonally stimulated  $CD4^+CD25^{low}$  Tconv (Figure 2B).

### *Interaction of Tregs with lung allografts during rat EVLP*

Tregs were tracked over time in the EVLP circuit (Figure E1D-E) by dye labeling (Figure 3A). The proportion of Tregs among live cells in both pulmonary artery (PA) and vein (PV) perfusate rapidly increased after injection and plateaued within 60 min (Figure 3B). Remarkably, roughly 25% of administered Tregs remained in the EVLP circuit at the end of EVLP regardless of cell dose (Figure 3C). Treg infusion did not affect lung compliance (Figure 3D), vascular resistance (Figure 3E), or mean PA pressure (Figure 3F). Gas exchange – as measured by the ratio of the arterial partial pressure of oxygen to the fraction of inspired oxygen (P/F ratio, Figure 3G), and perfusate glucose and lactate concentrations (Figure E2A-B) were unaffected by Treg infusion.

### *Administered Tregs enter lung allografts and reduce lung vascular permeability at end of EVLP*

There was no difference in acute lung injury scores at the end of EVLP between Treg-treated lungs and controls (Figure 4A-B). The wet-to-dry weight ratio of the lung graft – a measure of lung water content – at the end of EVLP was lower in Treg-treated lungs (Figure 4C), suggesting that Tregs may have helped to maintain alveolar integrity; despite this observation, ZO-1 expression was similar among Treg-treated lungs and controls (Figure E2D).

At the end of EVLP, CMTMR<sup>+</sup> Tregs could be seen outside CD31<sup>+</sup> vascular structures in the lung parenchyma (Figure 4D). Tregs entered the lung in a dose-dependent manner, without evidence of saturation in the range of doses tested (Figure 4E). We sorted CMTMR<sup>+</sup> eF450<sup>+</sup> Tregs from digested lung tissue at the end of EVLP (Figure 4F) and found that they could suppress the proliferation of syngeneic polyclonally-stimulated Tconv to an extent that was comparable to, albeit slightly lower than, that of Tregs remaining in the EVLP circuit (Figure 4G). Compared to control lungs, Treg-treated lungs, as expected, had higher levels of the Treg-related transcripts FoxP3, CTLA4, GITR, and CCR4 at the end of EVLP (Figure 4H). There was no difference in the rate of apoptosis, as measured by TUNEL staining, in Treg-treated lungs up to 200 million Tregs per kg donor body weight, compared to controls (Figure E2E). Further, Tregs themselves were not apoptotic at the end of EVLP ( $0.97 \pm 0.52\%$ , Figure E2F).

#### *Transferred Tregs remain functional in the recipient post-transplant*

Transferred Tregs were still detectable in the lung graft on day 3 post-transplant (Figure 5A). Compared to the end of EVLP, the transferred cells had shifted by this time to a predominantly subpleural, rather than a perihilar location (Figure 5B). Tregs mediate contact-dependent modulation of MHC class II<sup>+</sup> antigen-presenting cells (15). Interestingly, the percentage of Tregs adjacent to MHC class II-expressing cells in the lung graft was increased on day 3 compared to at the end of EVLP (Figure 5C). Further, FoxP3 expression by CD4<sup>+</sup> T cells was higher in Treg-treated allografts than in controls at day 3 post-transplant (Figure 5D). Transferred Tregs were also identified in the draining lymph nodes (dLNs) on day 3, within the extravascular space (Figure 5E).

At day 3 post-transplant, there was no meaningful difference in histological acute lung injury scores between Treg-treated animals and controls, with allografts in both groups exhibiting only mild abnormalities (Figure 6A-B). The number of CD3<sup>+</sup> Tconv cells adjacent to MHC class II<sup>+</sup> cells was reduced in Treg-treated lung grafts on day 3 compared to control grafts (Figure 6C-D). Moreover, within Treg-treated lung allografts, significantly fewer CD3<sup>+</sup> Tconv cells were adjacent to MHC class II<sup>+</sup> cells that were closely associated with transferred Tregs in comparison with MHC class II<sup>+</sup> cells that were not (Figure 6E).

The percentage of CD3<sup>+</sup> T cells among intra-graft live cells at day 3 post-transplant was decreased by Treg treatment (Figure 6F). T cell activation markers are limited in the rat, but upregulation of ICAM1 and CD44 and downregulation of CD62L have been reported (16–18). Using these markers, we observed activated Tconv in the lungs and dLNs at day 3 (Figure E4D-I). Treg administration during EVLP reduced the population of activated CD4<sup>+</sup> T cells expressing ICAM1 and CD44 in both the lung graft and dLNs. Examination of other activated subsets, namely the ICAM1<sup>+</sup>CD62L<sup>-</sup> population (Figure E4J-K) and the CD44<sup>+</sup>CD62L<sup>-</sup> population (Figure E4L-M) revealed similar findings. The population of activated ICAM1<sup>+</sup>CD62L<sup>-</sup> CD8<sup>+</sup> T cells was also decreased by Treg in the treated lung graft, but not in the dLNs (Figure 6I-J). The expression of FoxP3 and Granzyme B were still elevated in the lung



grafts of Treg-treated rats on day 3 post-transplant compared to controls (Figure E4N), but not in the dLNs (Figure E4O).

At day 7 post-transplant, histological acute lung injury and lung allograft rejection scores (ISHLT A and B grades) were similar between animals receiving Treg-treated lungs and controls (Figure E5A-B). Total CD4<sup>+</sup> T cell numbers were reduced in Treg-treated lung allografts, although this observation did not reach statistical significance (Figure 7A). Our ability to detect the transferred cells was limited by loss of tracking dye intensity over time. Nevertheless, FoxP3 expression in CD4<sup>+</sup> T cells remained higher in Treg-treated allografts, compared to controls at this point (Figure 7B). CD90 is upregulated on activated rat T cells (19), and in keeping with this finding, we observed fewer activated CD90<sup>+</sup> CD4<sup>+</sup> T cells in the lung allograft at day 7 post-transplant (Figure 7C); reductions in CD90<sup>+</sup>CD4<sup>+</sup> T cells were also seen in the dLNs but these findings were not statistically significant. No significant difference in Treg-related transcripts was observed between Treg-treated lung grafts and controls at day 7 post-transplant (Figure E5E).

### *Administration of allogeneic human Tregs during human EVLP*

Human Tregs expanded 1,067.7 ± 363.4-fold and were 96.3 ± 1.2% viable after 21 days in culture (Table E1). Viable cells were 81.4 ± 4.7% FoxP3<sup>+</sup> and 81.8 ± 5.3% CTLA4<sup>+</sup> (Figure 8A). Clinical characteristics of lung donors and EVLP parameters are shown in Table S2. Injected Tregs were 87.1 ± 1.2% viable and 80.2 ± 6.7% CD4<sup>+</sup>CD127<sup>-</sup>. EVLP perfusate measurements are shown in Table S1. Transferred Tregs were identifiable in lung tissue samples obtained 1h after injection (Figure 8B). Tregs in the perfusate and lung were also identified by flow cytometry (Figure 8C). Expression of key functional Treg markers CTLA4, CD15s, CD39, 4-1BB, CCR4, and CXCR4 was higher in Tregs in the lung than in those left in the EVLP circuit 1h after injection (Figure 8D). However, there was no clear difference in FoxP3 or several other molecules (Figure 8E). We also observed an increase in Treg-related transcripts (IL10, Granzyme B, and IDO-1) 1h after Treg injection compared to the changes in untreated control lungs over a similar time period on EVLP. Interestingly, FoxP3 and CTLA4 were not consistently upregulated in Treg-treated lungs compared to controls (Figure E6D).

## **Discussion**

We developed extended EVLP first as a tool for evaluating donor lungs prior LTx, with the intention to create a platform for pre-implantation therapeutic intervention. The ability to assess graft function prior to LTx has expanded the donor pool, as it allows surgeons to transplant lungs that would previously have been considered unsuitable for transplantation, with short- and long-term outcomes equivalent to conventional LTx (20). Beyond these important advances, EVLP holds promise as a tool for delivery of advanced cell and gene therapies to reduce lung allograft injury (7, 21). Furthermore, it specifically provides the unique ability to immunologically manipulate the donor organ in the recipient's favor, prior to the graft coming into contact with recipient immunity. With this concept in mind, in this study, we used EVLP to examine whether pre-transplant administration of expanded recipient Tregs to the graft could modify the alloimmune response at its earliest stages.

We were able to isolate and expand functionally suppressive rat CD4<sup>+</sup>CD25<sup>high</sup> Tregs, similar to previous experiences with mouse and human Tregs (22, 23). The cells did not cause injury or alter lung physiology across a wide range of doses and were taken up in a dose-dependent manner during EVLP. About 25% of the administered cells remained in the circuit during EVLP,

irrespective of the administered dose. Whereas T cell receptor (TCR)-MHC interaction mediates CD8<sup>+</sup> T cell uptake by allografts (24), its role in CD4<sup>+</sup> T cell uptake is less clear (25, 26) and in any case, only ~10% of T cells are alloreactive (27), suggesting that, at least in the rat model, Treg entry into the lung was not strictly TCR-dependent. Chemokine receptors including CCR4, CCR5 and CXCR3 can promote Treg entry into tissues in a variety of contexts (28). Here, we found that CCR4 and CXCR4, but not CCR5, CCR6, CCR7 or CXCR3, were more highly expressed on Tregs entering human lungs than those remaining in the EVLP circuit, suggesting that these receptors may be involved in migration of the cells into the lung. Although suppressor of tumorigenicity 2 (ST2) directs Tregs to lung-expressed IL-33 in mice (29), the expression of ST2 has not been clearly demonstrated on human Tregs (30) and so it was unlikely to have played a role in the retention of Tregs in our human lung study. Whether TCR-MHC interaction and/or chemokine-chemokine receptor interaction is required for the uptake of Tregs by allogeneic lungs during EVLP, or whether other mechanisms are involved, is unclear and is a subject of ongoing research.

Tregs taken up by the lungs entered the parenchyma, by a process that did not cause injury to the lung allograft. The cells caused no adverse effects on lung physiology or biochemistry during EVLP and did not increase extravascular lung water at the end of EVLP; moreover, lung histology was comparable between treated and untreated lungs at the end of EVLP and at day 3 post-transplant. Movement of water out of pulmonary capillaries into the lung interstitium and alveolar spaces is an important component of lung injury and primary graft dysfunction after LTx (31, 32). Typically, this process involves disruption of the alveolar-capillary barrier, which can be revealed by staining for ZO-1 (7). Although lung water was reduced in Treg-treated lungs compared with controls, we found no difference in ZO-1 staining at the end of EVLP. This observation suggests that the degree of injury in these lungs may have been too mild to detect meaningful differences using this method. In keeping with this assertion, the wet-to-dry weight ratio of control lungs was also near normal (33). It is conceivable that Tregs may have altered one or more physiologic alveolar fluid clearance pathways (34), although we currently have no evidence to support this possibility. Whether polyclonally-expanded Tregs have a capacity for repair of more damaged lungs is an important question that awaits further investigation.

There was an increase in intra-graft Treg-associated transcripts (FoxP3, CTLA4, and GITR) at the end of EVLP in the rat model, and Tregs sorted from treated lungs retained suppressive function. The mildly reduced suppressive capacity of cells sorted from the lung might reflect a reduction in viability or loss of functional molecules as a result of enzymatic digestion, or could conceivably indicate that Tregs entering the lung were intrinsically less functional. Nevertheless, the transferred cells continued to exert immune regulation *in vivo* post-transplant. Tregs in the graft on day 3 exhibited increased proximity to antigen presenting cells (APCs), which are the principal site of immune regulation by Tregs *in vivo* (15). Recipient Tconv, in contrast, displayed reduced proximity to APCs in the presence of Tregs, with Treg-associated APCs showing the lowest proximity to Tconv. Further, Tconv in the lung allograft and dLNs exhibited reduced expression of activation markers compared to control lungs. These are important findings, as it has been shown that CD11c<sup>+</sup> APCs in the graft are the initial site of T cell priming in LTx, and that this process has already occurred by day 3 post-transplant (4).

We administered polyclonal allogeneic Tregs to human lungs and made a number of similar observations – including upregulation of immunoregulatory transcripts within the lungs following Treg administration. Allograft-directed immunoregulatory cell therapy, such as the

strategy presented here, therefore has the potential to intervene at the earliest stages of the alloimmune response in LTx. Another advantage of this approach is the ability to deliver large numbers of Tregs directly to the site of alloreactive T cell activation. For polyclonal Treg therapies, such as the ones used here, it has been estimated that a 1:1 or 1:2 Treg:Tconv ratio is required within the target organ to control the recipient's alloimmune response (35). To achieve this ratio with systemic Treg administration might be difficult, but our strategy suggests a means by which to attain this goal.

The allograft-directed approach presented here has limitations. We administered polyclonal Tregs to the lung allograft, so it is likely that only a minority of these cells were reactive to donor antigens. Ultimately, since donor antigen-reactive Tregs are more potent than a polyclonal population (36), it would be desirable to combine our approach with chimeric antigen receptor Tregs (37, 38). Although knowledge of donor antigens prior to LTx is not routinely possible today, one could conceive of a bank of recipient Tregs reactive to a variety of donor antigens, or possibly engineered Tregs that have lung-specific or lung-enriched proteins as their cognate antigens. We did not administer immunosuppressive drugs to the recipient animals, and since it is known that calcineurin inhibitor drugs can limit Treg function *in vivo* (39), it is likely that standard LTx immunosuppression would reduce the effectiveness of Treg cells given to the organ. Additional work will be required in this context to understand the impact of pre-transplant Treg therapy on allograft rejection. We were not able to track administered cells consistently beyond day 3, an observation which may have resulted from dilution of labeling dyes and/or a component of cell death, clearance or migration to other sites; nevertheless, Foxp3<sup>+</sup> cells were more prevalent among CD4<sup>+</sup> T cells in Treg-treated grafts compared with controls at 7 days post-transplant. Clearly, however, since Foxp3<sup>+</sup> cells only accounted for ~10% of intra-graft CD4<sup>+</sup> T cells at day 7, further optimization of our approach will be required in order to have a meaningful impact on lung allograft rejection. It should be noted, however, that selective immunosuppressive approaches to enhance desired T cell responses – such as those mediated by Tregs – are emerging (40, 41) and it would be attractive to combine one of them with pre-transplant Treg administration.

In summary, we have demonstrated that recipient-derived expanded Tregs can be administered to rat and human lungs prior to transplant, resulting in their uptake by these organs. The cells did not injure the grafts and remained capable of inhibiting a Tconv response *in vitro* and *in vivo*. Our findings therefore support the concept that immune modulation can begin in the allograft even prior to transplantation, thus opening the door to personalized organ-directed immunoregulatory cell therapy.

### Acknowledgments:

We thank Toronto General Hospital EVLP team for supporting the human EVLP Treg injection experiments, and The Cell Science Research Foundation (Japan), The Kyoto University Foundation (Japan), and the International Society for Heart and Lung Transplantation for supporting E.M. via their research fellowship programs.

### References:

1. Vaikunthanathan T, Safinia N, Boardman D, Lechler RI, Lombardi G. Regulatory T cells: tolerance induction in solid organ transplantation. *Clin Exp Immunol* 2017;189:197–210.



2. Young JS, Yin D, Vannier AGL, Alegre ML, Chong AS. Equal expansion of endogenous transplant-specific regulatory T cell and recruitment into the allograft during rejection and tolerance. *Front Immunol* 2018;9:1385.
3. Graca L, Cobbold SP, Waldmann H. Identification of regulatory T cells in tolerated allografts. *J Exp Med* 2002;195:1641–1646.
4. Gelman AE, Li W, Richardson SB, Zinselmeyer BH, Lai J, Okazaki M, Kornfeld CG, Kreisel FH, Sugimoto S, Tietjens JR, Dempster J, Patterson GA, Krupnick AS, Miller MJ, Kreisel D. Acute Lung Allograft Rejection Is Independent of Secondary Lymphoid Organs. *J Immunol* 2009;182:3969–3973.
5. Wagnetz D, Sato M, Hirayama S, Matsuda Y, Juvet SC, Yeung JC, Guan Z, Zhang L, Liu M, Waddell TK, Keshavjee S. Rejection of tracheal allograft by intrapulmonary lymphoid neogenesis in the absence of secondary lymphoid organs. *Transplantation* 2012;93:1212–1220.
6. Cypel M, Yeung JC, Mingyao L, Anraku M, Chen F, Karolak W, Sato M, Laratta J, Azad S, Madonik M, Chow CW, Chaparro C, Hutcheon M, Singer LG, Slutsky AS, Yasufuku K, Perrot M De, Pierre AF, Waddell TK, Keshavjee S. Normothermic ex vivo lung perfusion in clinical lung transplantation. *N Engl J Med* 2011;364:1431–1440.
7. Cypel M, Liu M, Rubacha M, Yeung JC, Hirayama S, Anraku M, Sato M, Medin J, Davidson BL, De Perrot M, Waddell TK, Slutsky AS, Keshavjee S. Functional repair of human donor lungs by IL-10 gene therapy. *Sci Transl Med* 2009;1:4ra9.
8. Mordant P, Nakajima D, Kalaf R, Iskender I, Maahs L, Behrens P, Coutinho R, Iyer RK, Davies JE, Cypel M, Liu M, Waddell TK, Keshavjee S. Mesenchymal stem cell treatment is associated with decreased perfusate concentration of interleukin-8 during ex vivo perfusion of donor lungs after 18-hour preservation. *J Hear Lung Transplant* 2016;35:1245–1254.
9. Nadig SN, Wickiewicz J, Wu DC, Warnecke G, Zhang W, Luo S, Schiopu A, Taggart DP, Wood KJ. In vivo prevention of transplant arteriosclerosis by ex vivo-expanded human regulatory T cells. *Nat Med* 2010;16:809–813.
10. Ohsumi A, Kanou T, Ali A, Guan Z, Hwang DM, Waddell TK, Juvet S, Liu M, Keshavjee S, Cypel M. A Method for Translational Rat Ex vivoLung Perfusion Experimentation. *Am J Physiol Lung Cell Mol Physiol* 2020;319:L61–L70.
11. Noda K, Tane S, Haam SJ, Hayanga AJ, D’Cunha J, Luketich JD, Shigemura N. Optimal ex vivo lung perfusion techniques with oxygenated perfusate. *J Hear Lung Transplant* 2017;36:466–474.
12. Von Süßkind-Schwendi M, Ruemmele P, Schmid C, Hirt SW, Lehle K. Lung transplantation in the fischer 344-wistar kyoto strain combination is a relevant experimental model to study the development of bronchiolitis obliterans in the rat. *Exp Lung Res* 2012;38:111–123.
13. Stephens LA, Barclay AN, Mason D. Phenotypic characterization of regulatory CD4+CD25+ T cells in rats. *Int Immunol* 2004;16:365–375.

14. Verma ND, Robinson CM, Carter N, Wilcox P, Tran GT, Wang C, Sharland A, Nomura M, Plain KM, Bishop GA, Hodgkinson SJ, Hall BM. Alloactivation of naïve CD4<sup>+</sup> CD8<sup>+</sup> CD25<sup>+</sup> T regulatory cells: Expression of CD8 $\alpha$  identifies potent suppressor cells that can promote transplant tolerance induction. *Front Immunol* 2019;10:2397.
15. Tang Q, Adams JY, Tooley AJ, Bi M, Fife BT, Serra P, Santamaria P, Locksley RM, Krummel MF, Bluestone JA. Visualizing regulatory T cell control of autoimmune responses in nonobese diabetic mice. *Nat Immunol* 2006;7:83–92.
16. Mesri M, Liversidge J, Forrester J V. ICAM-1/LFA-1 interactions in T-lymphocyte activation and adhesion to cells of the blood-retina barrier in the rat. *Immunology* 1994;83:52–57.
17. Ponta H, Sherman L, Herrlich PA. CD44: From adhesion molecules to signalling regulators. *Nat Rev Mol Cell Biol* 2003;4:33–45.
18. Hengel RL, Thaker V, Pavlick M V., Metcalf JA, Dennis G, Yang J, Lempicki RA, Sereti I, Lane HC. Cutting Edge: L-Selectin (CD62L) Expression Distinguishes Small Resting Memory CD4<sup>+</sup> T Cells That Preferentially Respond to Recall Antigen. *J Immunol* 2003;170:28–32.
19. Paterson DJ, Jefferies WA, Green JR, Brandon MR, Corthesy P, Puklavec M, Williams AF. Antigens of activated rat T lymphocytes including a molecule of 50,000 Mr detected only on CD4 positive T blasts. *Mol Immunol* 1987;24:1281–1290.
20. Yeung JC, Krueger T, Yasufuku K, de Perrot M, Pierre AF, Waddell TK, Singer LG, Keshavjee S, Cypel M. Outcomes after transplantation of lungs preserved for more than 12 h: a retrospective study. *Lancet Respir Med* 2017;5:119–124.
21. Nakajima D, Watanabe Y, Ohsumi A, Pipkin M, Chen M, Mordant P, Kanou T, Saito T, Lam R, Coutinho R, Caldarone L, Juvet S, Martinu T, Iyer RK, Davies JE, Hwang DM, Waddell TK, Cypel M, Liu M, Keshavjee S. Mesenchymal stromal cell therapy during ex vivo lung perfusion ameliorates ischemia-reperfusion injury in lung transplantation. *J Hear Lung Transplant* 2019;38:1214–1223.
22. Ward ST, Li KK, Curbishley SM. A method for conducting suppression assays using small numbers of tissue-isolated regulatory T cells. *MethodsX* 2014;1:168–174.
23. McMurchy AN, Levings MK. Suppression assays with human T regulatory cells: A technical guide. *Eur J Immunol* 2012;42:27–34.
24. Walch JM, Zeng Q, Li Q, Oberbarnscheidt MH, Hoffman RA, Williams AL, Rothstein DM, Shlomchik WD, Kim J V., Camirand G, Lakkis FG. Cognate antigen directs CD8<sup>+</sup> T cell migration to vascularized transplants. *J Clin Invest* 2013;123:2663–2671.
25. Krupnick AS, Gelman AE, Barchet W, Richardson S, Kreisel FH, Turka LA, Colonna M, Patterson GA, Kreisel D. Cutting Edge: Murine Vascular Endothelium Activates and Induces the Generation of Allogeneic CD4<sup>+</sup> 25<sup>+</sup> Foxp3<sup>+</sup> Regulatory T Cells. *J Immunol* 2005;175:6265–6270.
26. Kreisel D, Krasinskas AM, Krupnick AS, Gelman AE, Balsara KR, Popma SH, Riha M, Rosengard AM, Turka LA, Rosengard BR. Vascular Endothelium Does Not Activate CD4<sup>+</sup> Direct Allorecognition in Graft Rejection. *J Immunol* 2004;173:3027–3034.

27. Noorchashm H, Lieu YK, Rostami SY, Song HK, Greeley SAS, Bazel S, Barker CF, Naji A. A direct method for the calculation of alloreactive CD4<sup>+</sup> T cell precursor frequency. *Transplantation* 1999;67:1281–1284.
28. Liston A, Gray DHD. Homeostatic control of regulatory T cell diversity. *Nat Rev Immunol* 2014;14:154–165.
29. Arpaia N, Green JA, Moltedo B, Arvey A, Hemmers S, Yuan S, Treuting PM, Rudensky AY. A Distinct Function of Regulatory T Cells in Tissue Protection. *Cell* 2015;162:1078–1089.
30. Lam AJ, MacDonald KN, Pesenacker AM, Juvet SC, Morishita KA, Bressler B, Pan JG, Sidhu SS, Rioux JD, Levings MK. Innate Control of Tissue-Reparative Human Regulatory T Cells. *J Immunol* 2019;202:2195–2209.
31. Pottecher J, Roche AC, Dégot T, Helms O, Hentz JG, Schmitt JP, Falcoz PE, Santelmo N, Levy F, Collange O, Uring-Lambert B, Bahram S, Schaeffer M, Meyer N, Geny B, Lassalle P, Diemunsch P, Massard G, Kessler R, Steib A, Hirschi S, Canuet M, Schuller A, Rosner V, Wirtz G, Weitzenblum E, Dan Vasilescu M, Olland A, Dupeyron JP, *et al.* Increased extravascular lung water and plasma biomarkers of acute lung injury precede oxygenation impairment in primary graft dysfunction after lung transplantation. *Transplantation* 2017;101:112–121.
32. Trebbia G, Sage E, Le Guen M, Roux A, Soummer A, Puyo P, Parquin F, Stern M, Pham T, Sakka SG, Cerf C. Assessment of lung edema during ex-vivo lung perfusion by single transpulmonary thermodilution: A preliminary study in humans. *J Hear Lung Transplant* 2019;38:83–91.
33. Kondo T, Chen F, Ohsumi A, Hijiya K, Motoyama H, Sowa T, Ohata K, Takahashi M, Yamada T, Sato M, Aoyama A, Date H.  $\beta$ 2-Adrenoreceptor Agonist Inhalation During Ex Vivo Lung Perfusion Attenuates Lung Injury. *Ann Thorac Surg* 2015;100:480–486.
34. Huppert LA, Matthay MA. Alveolar Fluid Clearance in Pathologically Relevant Conditions: In Vitro and In Vivo Models of Acute Respiratory Distress Syndrome . *Front Immunol* 2017;8:371.
35. Tang Q, Lee K. Regulatory T-cell therapy for transplantation: How many cells do we need? *Curr Opin Organ Transplant* 2012;17:349–354.
36. Sagoo P, Ali N, Garg G, Nestle FO, Lechler RI, Lombardi G. Human regulatory T cells with alloantigen specificity are more potent inhibitors of alloimmune skin graft damage than polyclonal regulatory T cells. *Sci Transl Med* 2011;3:83ra42.
37. MacDonald KG, Hoeppli RE, Huang Q, Gillies J, Luciani DS, Orban PC, Broady R, Levings MK. Alloantigen-specific regulatory T cells generated with a chimeric antigen receptor. *J Clin Invest* 2016;126:1413–1424.
38. Noyan F, Zimmermann K, Hardtke-Wolenski M, Knoefel A, Schulde E, Geffers R, Hust M, Huehn J, Galla M, Morgan M, Jokuszies A, Manns MP, Jaekel E. Prevention of Allograft Rejection by Use of Regulatory T Cells With an MHC-Specific Chimeric Antigen Receptor. *Am J Transplant* 2017;17:917–930.

39. Akimova T, Kamath BM, Goebel JW, Meyers KEC, Rand EB, Hawkins A, Levine MH, Bucuvalas JC, Hancock WW. Differing effects of rapamycin or calcineurin inhibitor on T-Regulatory cells in pediatric liver and kidney transplant recipients. *Am J Transplant* 2012;12:3449–3461.
40. Whitehouse G, Gray E, Mastoridis S, Merritt E, Kodala E, Yang JHMM, Danger R, Mairal M, Christakoudi S, Lozano JJ, Macdougall IC, Tree TIMM, Sanchez-Fueyo A, Martinez-Llordella M. IL-2 therapy restores regulatory T-cell dysfunction induced by calcineurin inhibitors. *Proc Natl Acad Sci* 2017;114:7083–7088.
41. Sockolosky JT, Trotta E, Parisi G, Picton L, Su LL, Le AC, Chhabra A, Silveria SL, George BM, King IC, Tiffany MR, Jude K, Sibener L V., Baker D, Shizuru JA, Ribas A, Bluestone JA, Garcia KC. Selective targeting of engineered T cells using orthogonal IL-2 cytokine-receptor complexes. *Science (80- )* 2018;359:1037–1042.

## Figure legends:

### Figure 1. Study protocols.

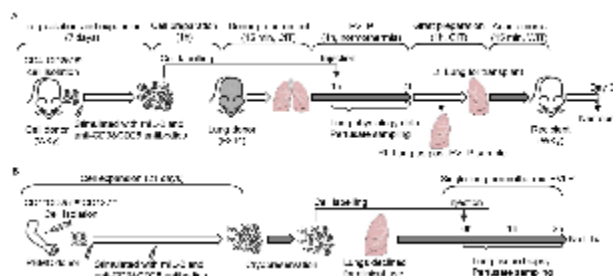

(A) Schematic of rat Treg experiment. CD4<sup>+</sup>CD25<sup>high</sup> cells (Figure E1A) were isolated from WKy rat lymph nodes and expanded with rhIL-2 and anti-CD3 and CD28 antibodies for 7 days. Prior to starting EVLP with a F344 rat heart and lung block, the expanded cells were dye labelled for injection. Labelled Tregs or perfusate vehicle were injected to the circuit at the PA port 1 hour after the start of EVLP. After 4 hours, the left lung graft was transplanted to a WKy recipient while the right lung was subjected to further analyses. (B) Schematic of human Treg experiment. CD4<sup>+</sup>CD25<sup>high</sup>CD127<sup>low</sup> cells from a healthy blood donor were isolated and expanded *in vitro*. After 21 days, the expanded Tregs were cryopreserved in liquid nitrogen. Upon notification that a lung was declined for transplantation on EVLP, Tregs were rapidly thawed, labeled with CMTMR and eF450, washed and injected into the EVLP circuit. EVLP continued for up to 2 hours after Treg injection, at which point tissue and perfusate were analyzed. Treg, regulatory T cell; EVLP, *ex vivo* lung perfusion; WKy, Wistar Kyoto; F344, Fisher 344; rhIL-2, recombinant human IL-2; PBMC, peripheral blood mononuclear cells.

### Figure 2. *In vitro* expansion of Tregs with keeping immunosuppressive effect.

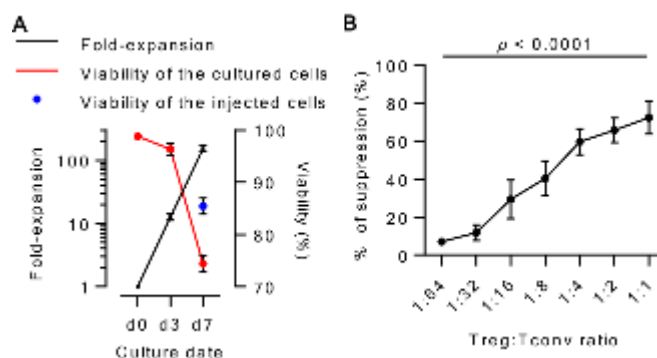

(A) Treg expansion. Fold-increase and viability of expanded Tregs on day 3 and day 7 of culture shown. Expanded cells were washed, increasing the viable proportion of injected cells to > 80%. (B) WKy Tregs mediate dose-dependent suppression of autologous Tconv ( $p < 0.0001$ , ANOVA). Gating strategy to identify CFSE-labelled Tconv is shown in Figure E1C. Treg, regulatory T cell; Tconv, conventional T cells.

### Figure 3. Administration of expanded WKy Tregs to allogeneic F344 lungs during EVLP.



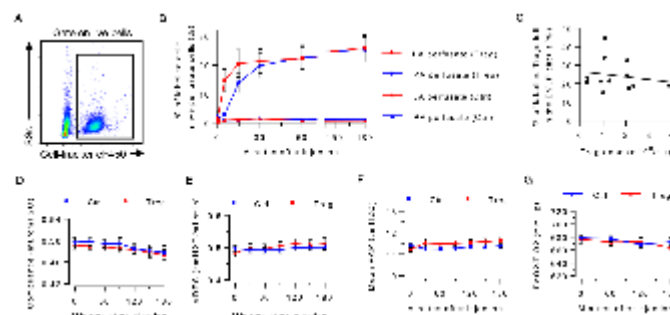

(A) Identification of labelled Tregs in EVLP perfusate by flow cytometry. (B) Proportion of Tregs in live perfusate cells at the PA and LA ports over time, which equalized at 60 minutes after injection. (C) The percentage of Tregs remaining in the circuit at the end of EVLP was calculated as  $100 \times (\text{live cell count in the perfusate}) \times (\text{fraction of Tregs in live perfusate cells}) / (\text{number of injected cells})$ . (D) Compliance, (E) Vascular resistance (VRES), (F) Mean pulmonary arterial pressure (PAP) of the donor lungs on EVLP, and (G) ratio of the partial pressure of oxygen in the perfusate (PaO<sub>2</sub>) to the fraction of inspired oxygen (FiO<sub>2</sub>) of allogeneic F344 lungs during EVLP with or without Treg injection. WKy, Wistar Kyoto; Treg, regulatory T cell; F344, Fisher 344; EVLP, *ex vivo* lung perfusion; PA, pulmonary artery; LA, left atrium.

**Figure 4.** Expanded WKy Tregs enter allogeneic F344 lungs during EVLP while maintaining their regulatory function and phenotypic properties.

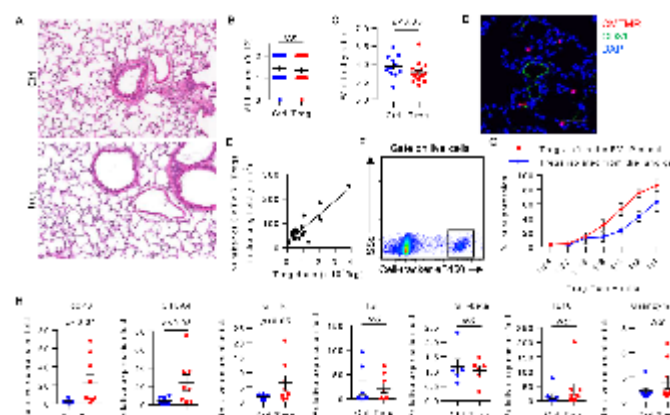

(A) Representative histology of the lung graft after EVLP (hematoxylin and eosin staining;  $\times 40$ ). (B) Acute lung injury (ALI) score. Semi-quantification of alveolar space hemorrhage, vascular congestion, interstitial edema/fibrin deposition, and interstitial infiltration of white blood cells is shown in Figure E2C. (C) Wet-to-dry weight ratio in Treg-treated and control lungs. Control grafts were significantly heavier than Treg-treated ones ( $p < 0.05$ , Mann-Whitney U test). (D) Immunofluorescence staining of the lung graft after EVLP demonstrates CMTMR<sup>+</sup> (red) Tregs located in the lung tissue outside CD31<sup>+</sup> (green) vessels. Scale bar=25  $\mu$ m. (E) The number of CMTMR<sup>+</sup> cells in the lung parenchyma was correlated with the injected dose of Tregs ( $p < 0.0001$ ,  $R^2 = 0.7542$ ,  $Y = 0.5580 \times X + 22.75$ ). (F) Identification of transferred Tregs in the digested lung by flow cytometry. (G) Tregs sorted from perfusate and digested lung tissue at the end of EVLP exhibited dose-dependent suppressive activity toward autologous Tconv ( $p = 0.0001$  and  $p < 0.0001$  for Tregs isolated from the lung graft and those left in the EVLP circuit,

respectively; one-way ANOVA). (H) Treg-related transcripts in the lung graft after EVLP, represented as a relative expression fold based on house-keeping gene. FoxP3, CTLA4, and GITR expression were significantly increased in the lung graft of Treg-treated animals compared to control cases. WKy, Wistar Kyoto; Treg, regulatory T cell; F344, Fisher 344; EVLP, *ex vivo* lung perfusion; Tconv, conventional T cells.

**Figure 5.** Tracking Tregs in the recipient after lung transplantation.

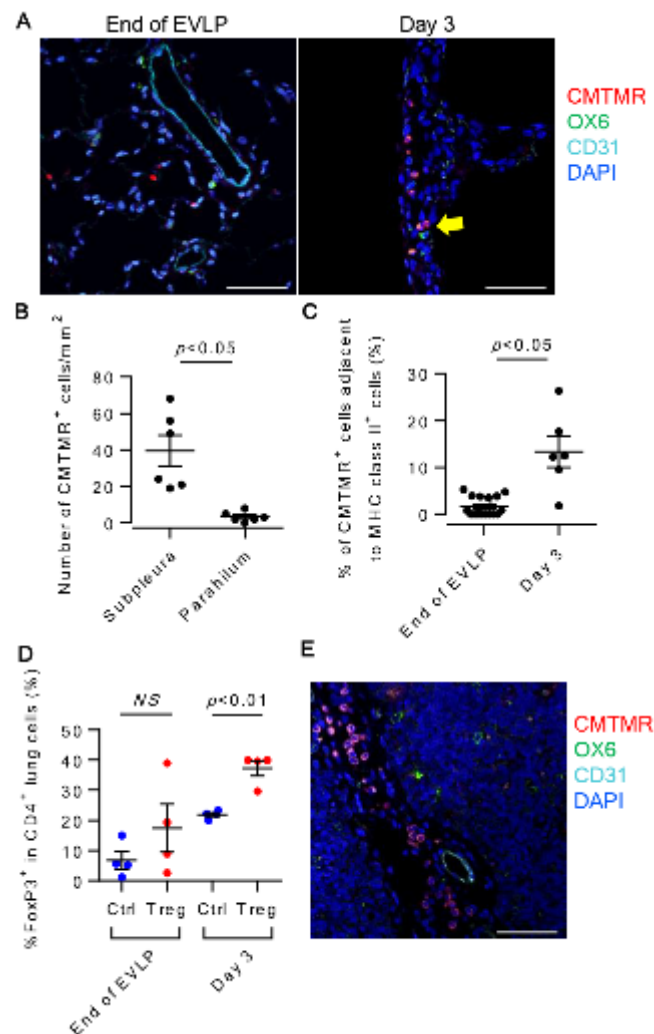

(A) Compared to at the end of EVLP, on day 3 post-transplant transferred CMTMR<sup>+</sup> Tregs (red) were predominantly located in the subpleural area ( $< 50 \mu\text{m}$  from pleural surface) and often seen in proximity to MHC class II<sup>+</sup> (green) cells (yellow arrow). Images from each channel are shown in Figure E3A-B. Scale bars =  $50 \mu\text{m}$ . (B) Spatial distribution of Tregs in the graft on day 3 ( $p < 0.05$ , Mann-Whitney U test), and (C) increased proximity of Tregs to MHC class II<sup>+</sup> cells on day 3 ( $p < 0.05$ , Mann-Whitney U test). (D) The proportion of intra-graft CD4<sup>+</sup> T cells expressing Foxp3 was increased in Treg-treated grafts compared to controls at day 3 and day 7 post-transplant ( $p < 0.01$ , Welch's T test). Gating strategy to identify intra-graft CD4<sup>+</sup> T cells and the representative histograms of FoxP3 expression in them are shown in Figure E3C and Figure E3D, respectively. (E) Identification of CMTMR<sup>+</sup> Tregs (red) in the mediastinal lymph nodes of

recipients of Treg-treated lung allografts on day 3. Images from each channel are shown in Figure E3E. Scale bar = 50  $\mu$ m. Treg, regulatory T cell; EVLP, *ex vivo* lung perfusion; MHC, major histocompatibility complex.

**Figure 6.** Post-transplant immune regulation by expanded Tregs delivered to the allograft prior to transplantation.

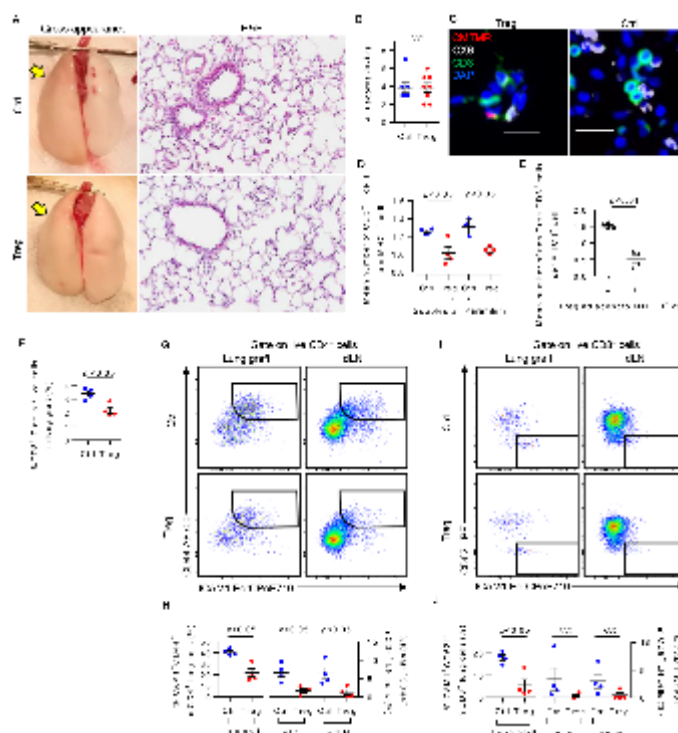

(A) Representative pictures of the gross appearance and the histology (hematoxylin and eosin staining;  $\times 40$ ) of the lung graft (yellow arrows) on day 3 post-transplant. (B) Acute lung injury (ALI) scores in Treg-treated and control grafts. Details of histological semi-quantification are shown in Figure E4A. (C) Representative high power immunofluorescence images showing intra-graft MHC class II<sup>+</sup> cells (white) adjacent to CMTMR<sup>-</sup>CD3<sup>+</sup> non-transferred Tconv (green) and CMTMR<sup>+</sup>CD3<sup>+</sup> transferred Tregs (red). Scale bars=20  $\mu$ m. (D) Mean number of CD3<sup>+</sup> T cells adjacent to MHC class II<sup>+</sup> cells in at least 10 high powered fields in Treg-treated and control lungs at the subpleural and perihilar areas. (E) Number of Tconv adjacent to MHC class II<sup>+</sup> cells without (-) or with (+) an adjacent Treg cell ( $p < 0.01$ , Mann-Whitney U test). (F) Percentage of CD3<sup>+</sup> T cells (gating strategy shown in Figure E4B), as well as CD4<sup>+</sup> T cells and CD8<sup>+</sup> T cells (Figure E4C), was significantly decreased in Treg-treated lung graft on day 3. Flow cytometric analysis of CD4<sup>+</sup> (G-I) and CD8<sup>+</sup> (J-L) Tconv activation in the lung allograft, dLN and ndLN at day 3 post-transplant. (G) Flow cytometric analysis of CD44 and ICAM1 expression on CD4<sup>+</sup> cells from the lung allograft and dLN. (H-I) Percentage of ICAM1<sup>+</sup>CD44<sup>+</sup> cells in the CD4<sup>+</sup> T cell compartment in the lung, dLN and ndLN at day 3. (J) Flow cytometric analysis of CD62L and ICAM1 expression on CD8<sup>+</sup> cells from the lung allograft and dLN. (K-L) Percentage of ICAM1<sup>+</sup>CD62L<sup>+</sup> cells in the CD8<sup>+</sup> T cell compartment in the lung, dLN and ndLN at day 3. Treg, regulatory T cell; MHC, major histocompatibility complex; Tconv, conventional T cells; dLN, draining lymph node; ndLN, non-draining lymph node.

**Figure 7.** Control of T cell activation in the lung allograft at 7 days post-transplant.

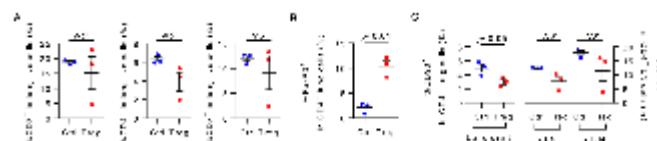

(A) Percentage of CD4<sup>+</sup> T cells was slightly decreased in Treg-treated lung graft on day 7, but CD8<sup>+</sup> T cells was not. Gating strategy is shown in Figure E5C. (B) Percentage of FoxP3<sup>+</sup> in CD4<sup>+</sup> T cells was significantly increased in Treg-treated lung graft on day 7, compared to control lungs. (C) Analysis of CD90 expression in CD4<sup>+</sup> in the lung graft on day 7. (D) CD90 expression on CD4<sup>+</sup> T cells was significantly decreased in the lung graft of Treg-treated animals compared to control cases, but not statistically significant in dLN and ndLN. Analysis of FoxP3 and CD90 expression in CD4<sup>+</sup> T cells in the lung graft is shown in Figure E5D. Treg, regulatory T cells; dLN, draining lymph node; ndLN, non-draining lymph node.

**Figure 8.** Delivery of human Tregs to allogeneic human lungs during EVLP.

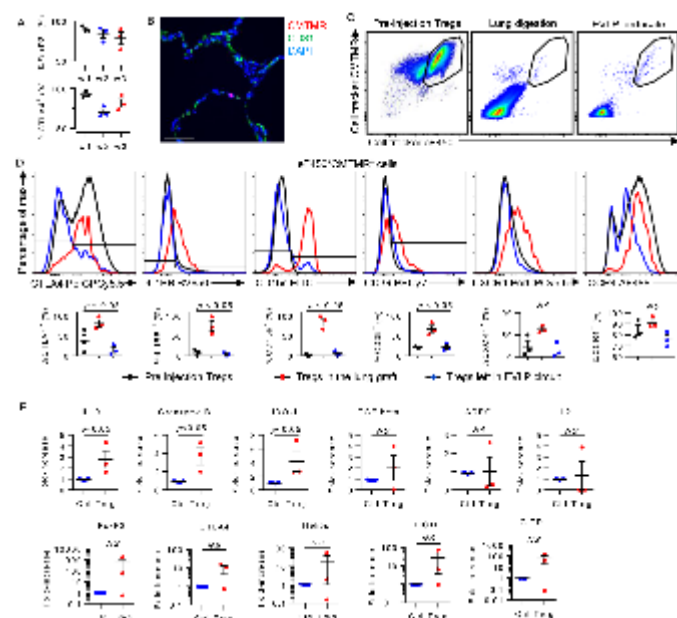

(A) Expression of FoxP3 and CTLA4 during 21 days of expansion. (B) Immunofluorescence staining of the lung graft 1 hour after Treg administration. CMTMR<sup>+</sup> cells (red) were identifiable in the parenchyma. Images from each channel are shown in Figure E6C. Scale bar = 50  $\mu$ m. (C) Flow cytometric analysis of Tregs before injection (left panel), in the lung graft (middle panel) and in the perfusate (right panel) 1 hour after injection. (D) Analysis of the expression of the indicated markers on eF450<sup>+</sup>CMTMR<sup>+</sup> cells in prior to injection (black lines), in the perfusate (blue lines) and in the lung allograft (red lines) 1 hour after injection, and those left in the EVLP circuit. There were significant differences in the expression of CTLA4, 4-1BB, CD15s, and CD39 on Tregs between the groups (repeated measures ANOVA). The expression of CXCR4 was relatively higher on Tregs in the lung graft than in those left in EVLP circuit ( $p = 0.0617$ , paired t test) although the intergroup difference was not significant. The majority of Tregs in the

lung graft was positive for CCR4 ( $90.9 \pm 2.8\%$ ). (E) Quantitative PCR analysis of the indicated transcripts in lung tissue. Transcripts measured at the end of EVLP and normalized to the housekeeping gene PPIA are displayed as a ratio to their abundance at the beginning of EVLP. Results from Treg-treated lungs ( $n = 3$ , red) are compared to results from untreated contemporaneous discarded lungs at the beginning and end of EVLP (blue lines). Mann-Whitney tests,  $p < 0.05$  for IL-10, granzyme B and IDO-1. Treg, regulatory T cell; EVLP, *ex vivo* lung perfusion; PBMC, peripheral blood mononuclear cells.
